# Supplementary material for: Combined DNA, toxicological and heavy metal analyses provides an auditing toolkit to improve pharmacovigilance of traditional Chinese medicine (TCM)
Source: PubMed Central journal article supplement (PMC4675079; doi:10.1038/srep17475), 2015-12-10
Supplement: srep17475-s1.pdf [file srep17475-s1.pdf]

**Combined DNA, toxicological and heavy metal analyses provides an auditing toolkit to improve pharmacovigilance of traditional Chinese medicine (TCM).**

Megan L. Coghlan<sup>1</sup>, Garth Maker<sup>2,3</sup>, Elly Crighton<sup>2,3</sup>, James Haile<sup>1</sup>, Dáithí C. Murray<sup>1</sup>, Nicole E. White<sup>1</sup>, Roger W. Byard<sup>4,5</sup>, Matthew I. Bellgard<sup>6</sup>, Ian Mullaney<sup>2,3</sup>, Robert Trengove<sup>2</sup>, Richard J.N. Allcock<sup>7,8</sup>, Christine Nash<sup>5</sup>, Claire Hoban<sup>4</sup>, Kevin Jarrett<sup>9</sup>, Ross Edwards<sup>9</sup>, Ian F. Musgrave<sup>4</sup> and Michael Bunce<sup>1\*</sup>.

**Table S1** TCM products purchased for this study from Adelaide, South Australia, including sample ID, medicinal type and listed package ingredients.

| Sample ID | Medicinal type | AUSTL number | Ingredients listed on packaging                                                                                                                                                                                                                                                                                                                                                                                                                                                                                                                                                                              |
|-----------|----------------|--------------|--------------------------------------------------------------------------------------------------------------------------------------------------------------------------------------------------------------------------------------------------------------------------------------------------------------------------------------------------------------------------------------------------------------------------------------------------------------------------------------------------------------------------------------------------------------------------------------------------------------|
| TCM 1     | Capsules       | No           | None listed                                                                                                                                                                                                                                                                                                                                                                                                                                                                                                                                                                                                  |
| TCM 2     | Tablets        | Yes          | Scutellaria baicalensis root, Xanthium sibiricum seed, Magnolia liliflora flower bud, Lonicera japonica flower, Atractylodes macrocephala root, Mentha haplocalyx leaf, Angelica dahurica root                                                                                                                                                                                                                                                                                                                                                                                                               |
| TCM 3     | Tablets        | Yes          | Xanthium sibiricum seed, Angelica dahurica root, Platycodon grandiflorum root, Magnolia liliflora flower bud, Schizonepeta tonuifolia herb, Ledebouriella divaricata root, Chrysanthemum sinense flower, Anemarrhena asphodel lids fruit, Forsythia suspensa fruit, Shizandra chinensis                                                                                                                                                                                                                                                                                                                      |
| TCM 4     | Pills          | No           | None listed                                                                                                                                                                                                                                                                                                                                                                                                                                                                                                                                                                                                  |
| TCM 5     | Pills          | No           | Radix notoginseng, Corex eucommiae, Radix ginseng, Ginamomum cassia presl, Olibanam, Herba taxilli, Fructose schisandrae, Radix angelicae pubescentis                                                                                                                                                                                                                                                                                                                                                                                                                                                        |
| TCM 6     | Pills          | Yes          | Herbal powder, Angelica polymorpha root, Codonopsis pilosura root, Polygonatum sibirica rhizome, Polygamy sibirica root, Atractylodes macrocephala rhizome, Poria cocos fruit body, Zizyphus jujube fruit, Glycyrrhiza uralensis root, Fructose, glucose, sucrose (from honey)                                                                                                                                                                                                                                                                                                                               |
| TCM 7     | Pills          | Yes          | Herbal powder, Codonopsis pilosura root, Astragalus membranaceus root, Paeonia lactiflora root, Atractylodes macrocephala rhizome, Poria cocos fruit body, Rehmannia glutinosa root, Angelica polymorpha root, Cinnamomum cassia branch, Glycyrrhiza uralensis root                                                                                                                                                                                                                                                                                                                                          |
| TCM 8     | Pills          | No           | Achryanthes bidentata root, Anemarrhena asphodeloids root, Angelica polymorpha root, Angelica pubescens root, Astragalus membranaceus root, Atractylodes macrocephala root, Chaenomeles speciosus fruit, Cuscuta hygrophilae seed, Cynomorium songariorum stern, Dipsacus asper root, Eucommia ulmoides stern bark, Gentians macrophylla root, Ledebouriella divaricata root, Lycium barbarum fruit, Notoperyguim incisium root, Paenoiia lactiflora root, Panax ginseng root, Phellodendron amurense stem bark, Poria cocos root, Psoralea coryliliflora fruit, Rhemmania glutinosa root, Sugars from honey |
| TCM 9     | Pills          | Yes          | Herbal powder, Astragalus membranaceus, Glycyrrhiza uralensis root and rhizome, Codonopsis pilosula root, Atractylodes macrophala rhizome, Angelica polymorpha root, Citrus reiculata frui peri, Cimifuga heracleifolia root, Ziziphus jujuba fruit, Zingiber officinale rhizome, Glucose, sucrose from licorice                                                                                                                                                                                                                                                                                             |
| TCM 10    | Flakes         | No           | None listed                                                                                                                                                                                                                                                                                                                                                                                                                                                                                                                                                                                                  |
| TCM 11    | Tea bags       | No           | Eritrea japonica leaf, Angelica dahurica root, Fritillaries thundbergii bulb, Peucedanum praeruptorum root, Xanthium sibiricum fruit, Scutellaria baicalensis root, Pinellia ternata tuber, Glycyrrhiza uralensis root, Cynanchum stauntonii root, rhizome, Ephedra sinica stem, Morus alba root skin, Perilla frutesciens leaf, Poria cocos fruit, Citrus reticulata fruit peri.                                                                                                                                                                                                                            |
| TCM 12    | Capsules       | Yes          | Zizyphus spinosa fruit flesh, Poria cocos root, Polygonum multiflorum stem, Schisandra chinensis fruit, Polygala sibirica root                                                                                                                                                                                                                                                                                                                                                                                                                                                                               |
| TCM 13    | Tea bags       | No           | Radix gentiane macrophyllae, Cortex eucommiae, Radix polygoni sue multiflori, Rhizome ligustici, Radix notoginseng, Epimedium grandiflora, Spatholobus suberectus, Radix astragati seu hedydari, Fructus lycii, Fructus rubi, Semen cuscutae, Rosae cuscutae, Fructus mori, Fructus comi, Fructus hordei germinatns, Clematis chinensis, Radix rehmanniue, Nelumbo nucifera, Poria, Rhizoma dioscoreae, Semen sesami, Ramulus loranthi, Radix glycyrrhizae                                                                                                                                                   |
| TCM 14    | Pills          | No           | None listed                                                                                                                                                                                                                                                                                                                                                                                                                                                                                                                                                                                                  |

**Table S1 continued**

| Sample ID | Medicinal type | AUSTL number | Ingredients listed on packaging                                                                                                                                                                                                                                                                                                                                                                                                                                                           |
|-----------|----------------|--------------|-------------------------------------------------------------------------------------------------------------------------------------------------------------------------------------------------------------------------------------------------------------------------------------------------------------------------------------------------------------------------------------------------------------------------------------------------------------------------------------------|
| TCM 15    | Pills          | Yes          | Zizyphus jujuba fruit, Poria cocos fruit body, Paeonia lactiflora root, Polygonum multiflorum tuber, Glycyrrhiza uralensis root, rhizome, Ophiopogon japonicus tuber, Biota orientalis seed, Curcuma aromatica tuber, Pimellia ternata rhizome, Chrysanthemum indicum flower, Polygala sibirica root, Schizandra chinensis fruit, Zizyphus spinosa seed                                                                                                                                   |
| TCM 16    | Pills          | No           | Herbal powder, Rehmannia glutinosa root, Dioscorea opposita rhizome, Cornus officinalis fruit flesh, Paeonia suffruticosa root bark, Portia cocos fruit body, Alisma orientale tuber                                                                                                                                                                                                                                                                                                      |
| TCM 17    | Drink          | No           | None listed                                                                                                                                                                                                                                                                                                                                                                                                                                                                               |
| TCM 18    | Capsules       | No           | None listed                                                                                                                                                                                                                                                                                                                                                                                                                                                                               |
| TCM 19    | Capsules       | No           | None listed                                                                                                                                                                                                                                                                                                                                                                                                                                                                               |
| TCM 20    | Capsules       | No           | Cordyceps, Ganoderma                                                                                                                                                                                                                                                                                                                                                                                                                                                                      |
| TCM 21    | Capsules       | No           | None listed                                                                                                                                                                                                                                                                                                                                                                                                                                                                               |
| TCM 22    | Capsules       | Yes          | Zizyphus jujuba seed, Anemarrhena asphodeloides rhizome, Salvia miltiorrhiza root and rhizome, Polygala sibirica root, Biota orientalis seed, Atractylodes macrocephala rhizome, Glycyrrhiza uralensis root and rhizome, Panax ginseng root and rhizome, Ophiopogon japonicus root tuber, Schizandra chinensis fruit, Morus alba fruit, Poria cocos white fruit                                                                                                                           |
| TCM 23    | Pills          | Yes          | Paeonia lactiflora root, Ligusticum wallichii root, Carthamus tinctorius flower, Poria cocos root, Sitesbeckia orientalis whole plant, Notopterygium incisum root, Lonicera japonica flower, Citrus reticulata peel, Angelica polymorpha root, Rehmannia glutinosa root, Atractylodes lancea root, Achyrantes bidentata root, Ledebouriella seseloides root, Atractylodes macrocephala rhizome, Glycyrrhiza uralensis root                                                                |
| TCM 24    | Tea bags       | No           | Astragalus membranaceus, Ophiopogon, Poria cocos, Licorice, Cornus officinalis, Reb tea                                                                                                                                                                                                                                                                                                                                                                                                   |
| TCM 25    | Tea bags       | No           | Fructus schinsandrae, Caulks spatnolobi, Rhizoma anemarrhenae, Rhizoma ligustici chuanxiong, Rhizoma acori graminei, Radix polygoni multiflori, Radix astragali seu hedydari, Fructus lycii, Fructus mori, Radix adenophorae strictae, Radix rehmanniae, Polygonum multiflorum, Rhizoma polygoni odorati, Semen raphani, Fructus hordei germaniatus, Flos lonicerae, Herba exliptae, Rhizoma alismatis, Nelumbo nucifera, Semen ziziphi spinosae, Poria, Semen sesami, Radix glycyrrhizae |
| TCM 26    | Tea bags       | No           | Fructus xanthii, Radix angelicae dahuricae, Flos magnoliae, Rhizoma ligustici chuanxiong, Herba menthae, Radix astragali seu hedydari, Rhizoma anemarrhenae, Fructus hordei germinatus, Semen cassiae, Semen raphani, Radix alismatis, Folium mori, Flos lonicerae, Bulbus fritillariae thunbergii, Nelumbo nucifera, Poria, Semen sesami, Rhizoma dioscoreae, Radix glycyrrhizae                                                                                                         |

**Table S2.** List of primers used in this study for generating fusion tagged amplicons for next generation sequencing (NGS)

| Primer Name       | Target            | Primer Sequence (5'-3')        | Annealing temp. | Product size | Source                                 |
|-------------------|-------------------|--------------------------------|-----------------|--------------|----------------------------------------|
| Titanium Primer A | Sequencing primer | CGTATCGCCTCCCTCGCGCCATCAG      |                 | N/A          | (Roche)                                |
| Titanium Primer B |                   | CTATGCGCCTTGCCAGCCCCTCAG       | N/A             |              |                                        |
| Ion Torrent A     | Sequencing primer | CCATCTCATCCCTGCGTGTCTCCGACTCAG |                 | N/A          | (Life Technologies)                    |
| Ion Torrent P1    |                   | CCTCTCTATGGGCAGTCGGTGAT        | N/A             |              |                                        |
| <i>trnL</i> g     | Plant species     | GGGCAATCCTGAGCCAA              |                 | 50-70 bp     | (Taberlet, Coissac <i>et al.</i> 2007) |
| <i>trnL</i> h     |                   | CCATTGAGTCTCTGCACCTATC         | 52 °C           |              |                                        |
| <i>rbcL</i> h1aF  | Plant species     | GGCAGCATTCCGAGTAACTCCTC        |                 | 80-100 bp    | (Poinar, Hofreiter <i>et al.</i> 1998) |
| <i>rbcL</i> h2aR  |                   | CGTCCTTTGTAACGATCAAG           | 52 °C           |              |                                        |
| 16S mam1          | Mammalian species | CGGTTGGGGTGACCTCGGA            |                 | 90-100 bp    | (Taylor 1996)                          |
| 16S mam2          |                   | GCTGTTATCCCTAGGGTAACT          | 57 °C           |              |                                        |

Individual fusion primers consisted of a forward or reverse sequencing primer followed by a 6-8 bp multiplex identifier (MID) tag, and one of the above gene specific primer sequences.

**Table S3.** Dosage instructions and sample weights of the 26 traditional Chinese medicines (TCMs) tested in this study.

| Sample ID | Dose                                                                                                                              | Weight (g) |
|-----------|-----------------------------------------------------------------------------------------------------------------------------------|------------|
| TCM1      | 2-3 capsules, 2 times daily                                                                                                       | 0.527      |
| TCM2      | 3-5 tablets, 3 times a day                                                                                                        | 0.366      |
| TCM3      | 3-4 tablets, 3 times daily                                                                                                        | 0.559      |
| TCM4      | 2 bottles are to be taken once every two hours, 4 times daily. 1/2 a bottle for children. (1 bottle contains about 2.3g of pills) | 0.029      |
| TCM5      | 4-5 pills, 4 times daily with warm water                                                                                          | 0.138      |
| TCM6      | 8 pills, 3 times daily, half to one hour before meals with warm water                                                             | 0.164      |
| TCM7      | 8 pills, 3 times daily, half to one hour before meals with warm water                                                             | 0.168      |
| TCM8      | 30- 60 pills each time, 2 times a day with warm or light salty water                                                              | 0.101      |
| TCM9      | 8 pills, 3 times daily, half to one hour before meals with warm water                                                             | 0.191      |
| TCM10     | From the internet: one 10g sachet made into a tea                                                                                 | N/A        |
| TCM11     | Add 1 to 2 tea bags into 150ml boiled water. Leave for 5 min and then drink. Drink 2 to 3 times a day.                            | 3.23       |
| TCM12     | 3 capsules, 3 times daily                                                                                                         | 0.592      |
| TCM13     | 4 tea bags in 1 litre of water. Boil for 5 minutes                                                                                | 4.45       |
| TCM14     | Once a day, 1-2 capsules each time. To be taken just before going to bed, with cool boiled water                                  | 0.261      |
| TCM15     | 15 pills, 3 times daily, half to one hour before meals with warm water                                                            | 0.181      |
| TCM16     | 8 pills, 3 times daily, half to one hour before meals with warm water                                                             | 0.182      |
| TCM17     | No English translation                                                                                                            | N/A        |

|       |                                                                                               |       |
|-------|-----------------------------------------------------------------------------------------------|-------|
| TCM18 | 1-2 capsules each time.<br>Take before sleep.                                                 | 0.378 |
| TCM19 | 1-2 capsules every night<br>before sleep                                                      | 0.313 |
| TCM20 | 1 capsule, 2 times a day or<br>take as often as needed.<br>(Maximum: 2-4 capsules<br>per day) | 0.559 |
| TCM21 | No English translation                                                                        | 0.447 |
| TCM22 | 3-4 capsules, 2 a day. If<br>necessary, 1 or 2 capsules<br>more before sleep.                 | 0.344 |
| TCM23 | 8 pills, 3 times daily, 30<br>min or 1 hour away from<br>meals with 250ml of water            | 0.192 |
| TCM24 | 4 tea bags in 1 litre of<br>water. Boil for 5 minutes                                         | 4.54  |
| TCM25 | 4 tea bags in 1 litre of<br>water. Boil for 5 minutes                                         | 4.73  |
| TCM26 | 4 tea bags in 1 litre of<br>water. Boil for 5 minutes                                         | 4.55  |

Table S4. Heavy metal results from SF-ICP-MS analysis of 25 traditional Chinese medicines (TCMs) tested in this study

| Sample ID     | Ba (ppm)  | Sr (ppm)  | Mn (ppm)  | Ag (ppm)  | Cd (ppm)  | Sb (ppm)  | Ti (ppm)  | Pb (ppm)  | Li (ppm)  | B (ppm)   | Na (ppm)  | Mg (ppm)  | Al (ppm)  | P (ppm)   | Ca (ppm)  | V (ppm)   | Cr (ppm)  | Mn (ppm)  | Fe (ppm)  | Co (ppm)  | Ni (ppm)  | Cu (ppm)  | Zn (ppm)  | Ba (ppm)  | Sn (ppm)  | K (ppm)   | As (ppm)  |
|---------------|-----------|-----------|-----------|-----------|-----------|-----------|-----------|-----------|-----------|-----------|-----------|-----------|-----------|-----------|-----------|-----------|-----------|-----------|-----------|-----------|-----------|-----------|-----------|-----------|-----------|-----------|-----------|
| TCM23<br>(1)  | 8.004E-02 | 9.305E+02 | 5.061E+00 | 6.646E-02 | 3.074E+00 | 1.104E+00 | 4.182E-01 | 1.362E+01 | 9.807E-01 | 5.319E+02 | 2.372E+04 | 2.941E+04 | 1.862E+03 | 3.326E+04 | 4.238E+04 | 6.758E+00 | 2.612E+01 | 7.295E+02 | 2.955E+04 | 8.903E+00 | 4.745E+01 | 1.199E+02 | 3.757E+02 | 2.084E+04 | 2.740E+00 | 2.363E+05 | 1.054E+01 |
| TCM11<br>(2)  | 9.279E-02 | 1.852E+03 | 1.687E+01 | 3.327E-01 | 1.907E+00 | 2.133E+00 | 8.404E-01 | 1.601E+02 | 3.460E+00 | 9.862E+02 | 1.341E+04 | 1.096E+05 | 4.291E+03 | 4.273E+04 | 2.807E+05 | 1.312E+01 | 1.514E+01 | 1.639E+03 | 6.038E+03 | 1.847E+01 | 4.784E+01 | 6.537E+02 | 7.231E+02 | 1.075E+03 | 7.579E+00 | 3.694E+05 | 1.641E+01 |
| TCM26<br>(3)  | 2.710E-01 | 1.223E+03 | 1.257E+01 | 1.833E-01 | 6.787E+00 | 1.519E+00 | 6.284E-01 | 3.469E+01 | B.D.L.    | 8.184E+02 | 1.449E+04 | 1.565E+03 | 7.117E+03 | 9.427E+04 | 1.715E+05 | 1.067E+01 | 1.933E+01 | 4.151E+03 | 5.491E+03 | 1.091E+01 | 2.686E+01 | 4.177E+02 | 1.043E+03 | 8.760E+02 | 3.941E+00 | 3.219E+05 | 1.415E+01 |
| TCM8<br>(4)   | 4.821E-02 | 1.148E+03 | 1.304E+01 | 3.019E-02 | 2.672E+00 | 7.522E-01 | 2.095E-01 | 2.105E+01 | 1.580E+00 | 4.701E+02 | 5.945E+04 | 3.499E+04 | 4.594E+03 | 1.916E+05 | 2.560E+05 | 1.072E+01 | 1.902E+01 | 6.349E+02 | 6.441E+03 | 6.632E+00 | 7.042E+01 | 1.395E+02 | 6.058E+02 | 5.849E+02 | 1.806E+00 | 2.110E+05 | 4.899E+00 |
| TCM24<br>(5)  | B.D.L.    | 8.019E+02 | 2.569E+01 | 4.898E-02 | 1.450E+00 | 7.128E-01 | 4.731E-02 | 1.062E+01 | B.D.L.    | 5.117E+02 | 4.718E+03 | 3.119E+04 | 8.298E+02 | 6.254E+04 | 3.434E+04 | 2.021E+00 | 4.185E+00 | 2.761E+02 | 1.535E+03 | 2.229E+00 | 2.331E+00 | 1.326E+02 | 4.692E+02 | 7.469E+01 | 3.056E+00 | 1.958E+05 | 3.989E+00 |
| TCM1<br>(6)   | 3.693E-01 | 1.257E+03 | 6.422E+00 | 1.155E-01 | 3.174E+00 | 1.569E+00 | 2.858E-01 | 4.557E+01 | 6.284E+01 | 6.238E+02 | 7.972E+04 | 1.225E+05 | 5.315E+03 | 3.253E+04 | 1.285E+05 | 1.613E+01 | 1.202E+01 | 1.807E+03 | 8.217E+03 | 6.679E+00 | 6.738E+01 | 1.925E+02 | 4.862E+02 | 1.125E+03 | 3.627E+00 | 1.940E+05 | 9.340E+00 |
| TCM4<br>(7)   | B.D.L.    | 5.541E+02 | 8.757E+00 | 1.969E-01 | 4.278E+00 | 1.432E+00 | 4.103E-01 | 5.464E+01 | B.D.L.    | 4.790E+02 | 3.421E+03 | 3.667E+04 | 3.764E+03 | 4.514E+04 | 6.744E+04 | 9.189E+00 | 2.065E+01 | 2.006E+03 | 1.322E+04 | 1.041E+01 | 4.767E+01 | 2.472E+02 | 5.679E+02 | 4.996E+02 | 2.897E+00 | 2.209E+05 | 1.926E+01 |
| TCM14<br>(8)  | B.D.L.    | 2.194E+01 | 2.611E+00 | B.D.L.    | B.D.L.    | 4.338E-01 | B.D.L.    | 1.053E+00 | B.D.L.    | 2.436E+02 | 2.429E+03 | 2.278E+03 | 1.058E+02 | 4.481E+03 | 6.399E+03 | B.D.L.    | 1.678E+00 | 3.909E+01 | 1.591E+02 | 3.808E-02 | B.D.L.    | 2.083E+00 | 4.958E+01 | 1.647E+01 | 1.221E+00 | 3.059E+03 | 2.003E-01 |
| TCM12<br>(9)  | 1.334E+00 | 4.926E+02 | 7.357E+00 | 4.588E-01 | 2.192E+00 | 1.629E+00 | 2.066E+00 | 2.736E+01 | 5.783E+00 | 1.220E+03 | 4.848E+04 | 9.433E+04 | 1.199E+04 | 1.024E+05 | 4.767E+04 | 2.126E+01 | 3.131E+01 | 2.748E+03 | 1.958E+04 | 2.437E+01 | 8.368E+01 | 1.535E+02 | 7.174E+02 | 4.923E+02 | 6.315E+00 | 7.799E+05 | 4.028E+01 |
| TCM3<br>(10)  | 7.162E-02 | 2.104E+02 | 5.319E+00 | B.D.L.    | 2.693E+00 | 1.728E+00 | 3.667E-01 | 7.431E+00 | B.D.L.    | 6.564E+02 | 1.645E+04 | 5.566E+04 | 3.841E+03 | 5.265E+04 | 3.934E+04 | 7.311E+00 | 1.962E+01 | 1.014E+03 | 3.320E+03 | 4.802E+00 | 6.511E+01 | 6.252E+01 | 2.648E+02 | 1.190E+02 | 1.951E+00 | 3.676E+05 | 8.593E+00 |
| TCM5<br>(11)  | 7.243E-02 | 1.181E+03 | 9.246E+00 | 2.349E-01 | 5.834E+00 | 1.709E+00 | 5.229E-01 | 6.167E+01 | B.D.L.    | 5.931E+02 | 1.337E+04 | 4.697E+04 | 3.942E+03 | 5.220E+04 | 1.015E+05 | 1.195E+01 | 1.193E+01 | 1.831E+03 | 4.599E+03 | 8.316E+00 | 3.921E+02 | 1.676E+02 | 5.136E+02 | 6.015E+03 | 1.714E+00 | 2.548E+05 | 8.090E+00 |
| TCM21<br>(12) | 1.130E+00 | 7.216E+02 | 1.969E+01 | 1.461E-01 | 3.223E+01 | 4.236E+00 | 2.153E+00 | 3.363E+01 | 4.664E-01 | 1.291E+03 | 4.357E+04 | 1.565E+05 | 1.620E+05 | 8.786E+04 | 1.775E+05 | 1.980E+01 | 2.781E+01 | 5.249E+03 | 6.148E+03 | 9.548E+01 | 2.611E+02 | 1.478E+02 | 7.676E+02 | 3.560E+02 | 3.959E+00 | 1.089E+06 | 5.928E+01 |
| TCM18<br>(13) | 1.013E+00 | 3.089E+03 | 1.367E+01 | 4.589E-01 | 2.403E+00 | 1.535E+00 | 3.170E-01 | 6.724E+01 | 7.672E+00 | 1.485E+03 | 8.203E+03 | 1.941E+05 | 7.253E+03 | 9.237E+04 | 3.399E+05 | 1.934E+01 | 2.062E+01 | 2.895E+03 | 1.116E+04 | 1.012E+01 | 3.331E+01 | 2.799E+02 | 1.148E+03 | 2.236E+03 | 3.868E+00 | 6.845E+05 | 2.237E+01 |
| TCM16<br>(14) | B.D.L.    | 4.979E+02 | 1.199E+01 | 6.612E-02 | 1.647E+00 | 1.734E+00 | 5.551E-01 | 1.066E+01 | 1.205E+01 | 5.781E+02 | 2.605E+04 | 4.081E+04 | 3.434E+03 | 4.827E+04 | 5.070E+04 | 9.318E+00 | 1.666E+01 | 1.051E+03 | 1.034E+04 | 9.523E+00 | 1.261E+02 | 1.213E+02 | 4.465E+02 | 1.794E+02 | 4.626E+00 | 4.044E+05 | 1.698E+01 |
| TCM20<br>(15) | B.D.L.    | 2.630E+02 | 1.878E+01 | 7.939E-02 | 6.991E-01 | 1.309E+00 | B.D.L.    | 4.304E+00 | B.D.L.    | 5.897E+02 | 6.040E+03 | 3.663E+04 | 1.625E+03 | 2.223E+05 | 3.364E+04 | 2.887E+00 | 7.606E+00 | 7.108E+02 | 4.310E+03 | 3.479E+00 | 1.638E+02 | 2.129E+02 | 7.873E+02 | 1.541E+02 | 4.093E+00 | 3.918E+05 | 8.949E+00 |
| TCM9<br>(16)  | 3.870E-01 | 1.883E+03 | 3.440E+01 | 2.679E-01 | 1.084E+00 | 1.942E+00 | 5.647E-01 | 1.108E+01 | 1.848E+01 | 1.035E+03 | 3.262E+04 | 8.302E+04 | 5.169E+03 | 1.163E+05 | 8.848E+04 | 2.246E+01 | 3.443E+01 | 1.032E+03 | 8.992E+03 | 1.100E+01 | 7.650E+01 | 2.209E+02 | 8.182E+02 | 1.108E+03 | 4.491E+00 | 5.079E+05 | 1.299E+01 |
| TCM2<br>(17)  | 1.170E-01 | 1.088E+03 | 4.568E+01 | 2.088E-01 | 2.867E+00 | 1.989E+00 | 1.101E+00 | 3.547E+01 | 1.509E+01 | 1.304E+03 | 1.072E+05 | 1.254E+05 | 2.473E+04 | 1.196E+05 | 9.436E+04 | 1.351E+01 | 1.947E+01 | 1.984E+03 | 7.012E+03 | 1.378E+01 | 3.029E+02 | 2.166E+02 | 7.951E+02 | 8.354E+02 | 3.771E+00 | 8.546E+05 | 3.191E+01 |
| TCM22<br>(18) | 4.867E-01 | 6.548E+01 | 9.412E+00 | B.D.L.    | 2.354E-01 | 9.065E-01 | 2.087E-01 | 2.402E+00 | 1.816E+00 | 6.574E+03 | 1.365E+04 | 9.310E+04 | 1.769E+03 | 2.108E+04 | 8.630E+03 | 1.533E+01 | 2.812E+00 | 2.741E+02 | 1.809E+03 | 4.169E+00 | 1.393E+01 | 2.108E+01 | 1.584E+02 | 6.587E+01 | 2.028E+00 | 1.454E+05 | 9.085E+00 |
| TCM25<br>(19) | 1.446E-01 | 7.512E+02 | 1.539E+01 | 2.159E-01 | 5.671E+00 | 1.840E+00 | 4.643E-01 | 2.257E+01 | B.D.L.    | 6.564E+02 | 7.030E+03 | 8.821E+04 | 3.486E+03 | 8.066E+04 | 1.056E+05 | 8.333E+00 | 1.213E+01 | 1.592E+03 | 7.499E+00 | 1.885E+01 | 2.065E+02 | 8.265E+02 | 5.219E+02 | 3.119E+00 | 2.642E+05 | 7.858E+00 |           |
| TCM19<br>(20) | 1.111E+00 | 5.648E+02 | 2.422E+01 | 1.038E+00 | 9.810E+00 | 3.927E+01 | 2.036E+00 | 1.815E+02 | B.D.L.    | 5.295E+02 | 3.164E+04 | 6.675E+04 | 4.615E+04 | 5.326E+04 | 2.335E+05 | 4.770E+01 | 4.901E+01 | 8.718E+03 | 3.293E+04 | 8.647E+01 | 6.424E+01 | 2.730E+02 | 1.312E+03 | 6.541E+02 | 3.344E+00 | 6.351E+05 | 1.325E+04 |
| TCM15<br>(21) | B.D.L.    | 1.144E+03 | 1.900E+01 | 3.835E-01 | 6.247E-01 | 1.903E+00 | 4.849E-01 | 6.421E+00 | 2.754E+00 | 5.752E+02 | 4.207E+04 | 4.350E+04 | 3.028E+03 | 3.426E+04 | 8.513E+04 | 4.995E+00 | 1.912E+01 | 3.971E+02 | 4.794E+03 | 4.272E+00 | 2.457E+01 | 1.533E+02 | 6.393E+02 | 2.102E+02 | 3.225E+00 | 1.982E+05 | 4.606E+01 |
| TCM7<br>(22)  | 1.794E-01 | 8.321E+02 | 2.146E+01 | 1.084E-01 | 6.818E+00 | 1.726E+00 | 8.988E-01 | 2.986E+01 | 2.149E+01 | 9.579E+02 | 5.790E+04 | 7.445E+04 | 4.489E+03 | 1.037E+05 | 7.065E+04 | 1.790E+01 | 1.332E+01 | 1.950E+03 | 4.937E+03 | 1.824E+01 | 3.890E+01 | 2.006E+02 | 7.064E+02 | 5.193E+02 | 2.376E+00 | 4.451E+05 | 2.466E+01 |
| TCM13<br>(23) | 2.655E-01 | 1.137E+03 | 1.904E+01 | 1.153E-01 | 3.915E+00 | 1.408E+00 | 6.139E-01 | 4.110E+01 | B.D.L.    | 6.843E+02 | 7.706E+03 | 5.571E+04 | 1.234E+04 | 6.417E+04 | 9.103E+04 | 1.265E+01 | 2.730E+01 | 3.098E+03 | 6.336E+03 | 1.021E+01 | 3.911E+01 | 1.961E+02 | 7.141E+02 | 6.101E+02 | 2.243E+00 | 2.636E+05 | 1.268E+01 |
| TCM10<br>(24) | B.D.L.    | 7.180E+01 | 6.608E+00 | B.D.L.    | B.D.L.    | 7.895E-01 | 3.747E-02 | 1.143E+02 | B.D.L.    | 3.177E+02 | 2.033E+03 | 8.783E+03 | 1.766E+02 | 1.038E+03 | 1.698E+04 | 3.043E+01 | 2.427E+00 | 8.928E+01 | 2.865E+02 | 8.441E-01 | 6.610E+01 | 8.167E+00 | 5.248E+01 | 1.323E+01 | 1.709E+00 | 3.759E+04 | 1.748E+00 |
| TCM6<br>(25)  | 8.746E-02 | 9.312E+02 | 1.472E+01 | 2.851E-01 | 2.004E+00 | 1.675E+00 | 4.720E-01 | 1.115E+01 | 3.663E+00 | 8.700E+02 | 2.679E+04 | 6.300E+04 | 4.272E+03 | 1.034E+05 | 5.854E+04 | 1.388E+01 | 4.664E+01 | 7.000E+02 | 5.562E+03 | 7.360E+00 | 3.633E+02 | 2.499E+02 | 6.836E+02 | 9.267E+02 | 4.152E+00 | 3.859E+05 | 1.044E+01 |

# B.D.L. Denotes that the concentration of an element in this sample is Below Detection Limits
